# Supplementary material for: Text Messages Sent to Household Tuberculosis Contacts in Kampala, Uganda: Process Evaluation
Source: PubMed Central journal article supplement (PMC6280036; doi:10.2196/10239), 2018-11-20
Supplement: mhealth_v6i11e10239_app3.pdf [file mhealth_v6i11e10239_app3.pdf]

**Multimedia Appendix 4.** Follow-up phone survey for participants who sent an SMS reply.

|                                                                                                                                                                                                                                                                                                                                                                                                                                                                                            |                   |     |
|--------------------------------------------------------------------------------------------------------------------------------------------------------------------------------------------------------------------------------------------------------------------------------------------------------------------------------------------------------------------------------------------------------------------------------------------------------------------------------------------|-------------------|-----|
| <p>My name is ....., I am a team member with TB contact investigation program with the Uganda National TB and Leprosy Programme and investigators from Makerere University and Yale University in the USA. A community health worker from [health center name] health center visited your home a few weeks ago to screen your household for TB symptoms. I am calling to ask a few questions as a follow-up about text messages you may have received after this visit from our study.</p> |                   |     |
| 1. Are you willing to answer a few questions about your text messaging experiences?                                                                                                                                                                                                                                                                                                                                                                                                        | No (0)<br>Yes (1) | 1.  |
| <b>If participant answers No, thank participant for their time and end survey</b>                                                                                                                                                                                                                                                                                                                                                                                                          |                   |     |
| 2. Within the last few weeks we sent you an SMS text message about TB that you said you received. Do you remember what that message said? ( <b>Skip</b> to Question 4 if No)                                                                                                                                                                                                                                                                                                               | No (0)<br>Yes (1) | 2.  |
| 3. What did the message say? (Ask the question open ended and then place an X next to any response(s) below that match what the participant says)                                                                                                                                                                                                                                                                                                                                          |                   |     |
| a. Participant unable to describe message                                                                                                                                                                                                                                                                                                                                                                                                                                                  |                   | 3a. |
| b. Participant mentioned need to return to the clinic                                                                                                                                                                                                                                                                                                                                                                                                                                      |                   | 3b. |
| c. Mention of HELP keyword                                                                                                                                                                                                                                                                                                                                                                                                                                                                 |                   | 3c. |
| d. Mention of TB unlikely or negative status                                                                                                                                                                                                                                                                                                                                                                                                                                               |                   | 3d. |
| e. Mention of TB positive status                                                                                                                                                                                                                                                                                                                                                                                                                                                           |                   | 3e. |
| f. Other: Please specify                                                                                                                                                                                                                                                                                                                                                                                                                                                                   | 3f:               |     |
| 4. Please list any interesting comments from the participant or issues encountered.                                                                                                                                                                                                                                                                                                                                                                                                        |                   | 4.  |
